# Supplementary material for: Desiccation tolerance in bryophytes: The dehydration and rehydration transcriptomes in the desiccation-tolerant bryophyte Bryum argenteum
Source: PubMed Central journal article supplement (PMC5548717; doi:10.1038/s41598-017-07297-3), 2017-08-08
Supplement: 41598_2017_7297_MOESM1_ESM.pdf [file 41598_2017_7297_MOESM1_ESM.pdf]

## Supplementary Information

### Desiccation Tolerance in Bryophytes: The dehydration and rehydration transcriptomes in the desiccation-tolerant bryophyte *Bryum argenteum*

Bei Gao<sup>1,2</sup>, Xiaoshuang Li<sup>1</sup>, Daoyuan Zhang<sup>1,\*</sup>, Yuqing Liang<sup>1,3</sup>, Honglan Yang<sup>1</sup>, Moxian Chen<sup>2</sup>, Yuanming Zhang<sup>1</sup>, Jianhua Zhang<sup>2</sup>, Andrew J. Wood<sup>4</sup>

<sup>1</sup>Key Laboratory of Biogeography and Bioresource in Arid Land, Xinjiang Institute of Ecology and Geography, Chinese Academy of Sciences, Urumqi 830011, China.

<sup>2</sup>School of Life Sciences and State Key Laboratory of Agrobiotechnology, The Chinese University of Hong Kong, Hong Kong, China.

<sup>3</sup>University of Chinese Academy of Sciences, Beijing 100049, China.

<sup>4</sup>Department of Plant Biology, Southern Illinois University-Carbondale, Carbondale, IL 62901-6509, USA.

\* Correspondence should be addressed to D.Z. (email: zhangdy@ms.xjb.ac.cn)

#### Supplementary Figures and Tables:

**Figure S1:** Overview of the changes of relative water content (RWC) in cultured *Bryum argenteum* subjected to continuous dehydration and rehydration.

**Figure S2:** Flow-chart showing steps in *Bryum argenteum* transcriptome assembly and annotation, and downstream transcript clustering and differential expression analysis.

**Figure S3:** Transcript length distribution of the *de novo* assembled and refined *Bryum argenteum* transcriptomes.

**Figure S4:** GO category distribution of “Bryum\_final” transcriptome among 2<sup>nd</sup> level GO categories: biological process (BP), molecular function (MF), and cellular component (CC).

**Figure S5:** BLASTX top-hit species distribution of the Bryum\_final transcriptome in NCBI-nr database.

**Figure S6:** Heatmaps illustrating the expression profiles of the LEA group transcripts upon dehydration and rehydration.

**Figure S7:** Heatmaps illustrating the expression profiles of the HSP90, HSP20 and HSP33 family transcripts upon dehydration and rehydration.

**Table S1:** Distribution of percent length coverage for the top matching Swiss-Prot database entries.

**Table S2:** Percentage of totally and uniquely mapped reads to the Bryum\_final reference transcriptome.

**Table S3:** Selected transcripts and primers used for quantitative real-time PCR (qPCR) analysis.

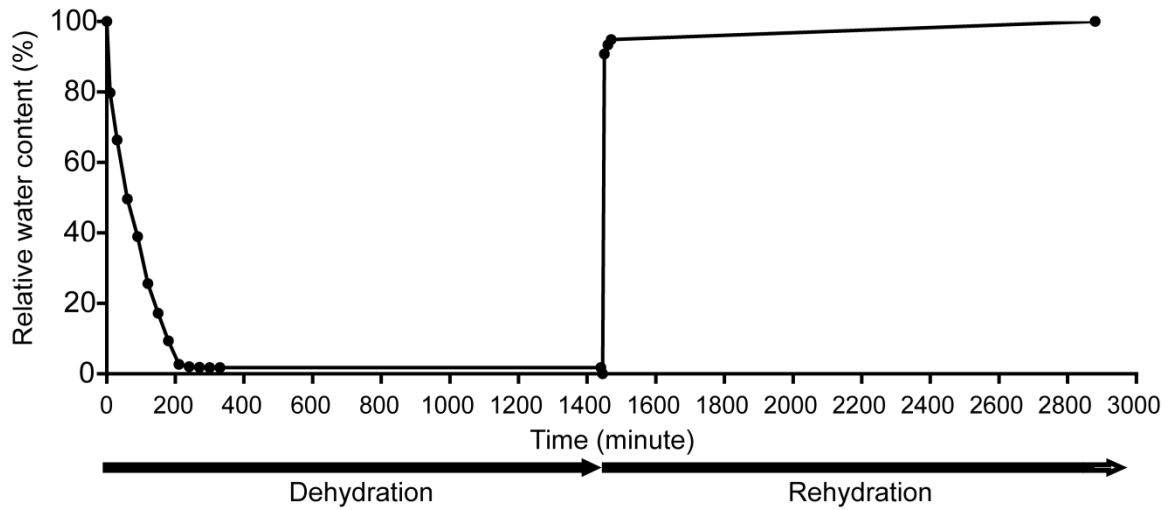

**Figure S1.** A simple overview of the changes of relative water content in cultured *Bryum argenteum* subjected to continuous dehydration and rehydration.

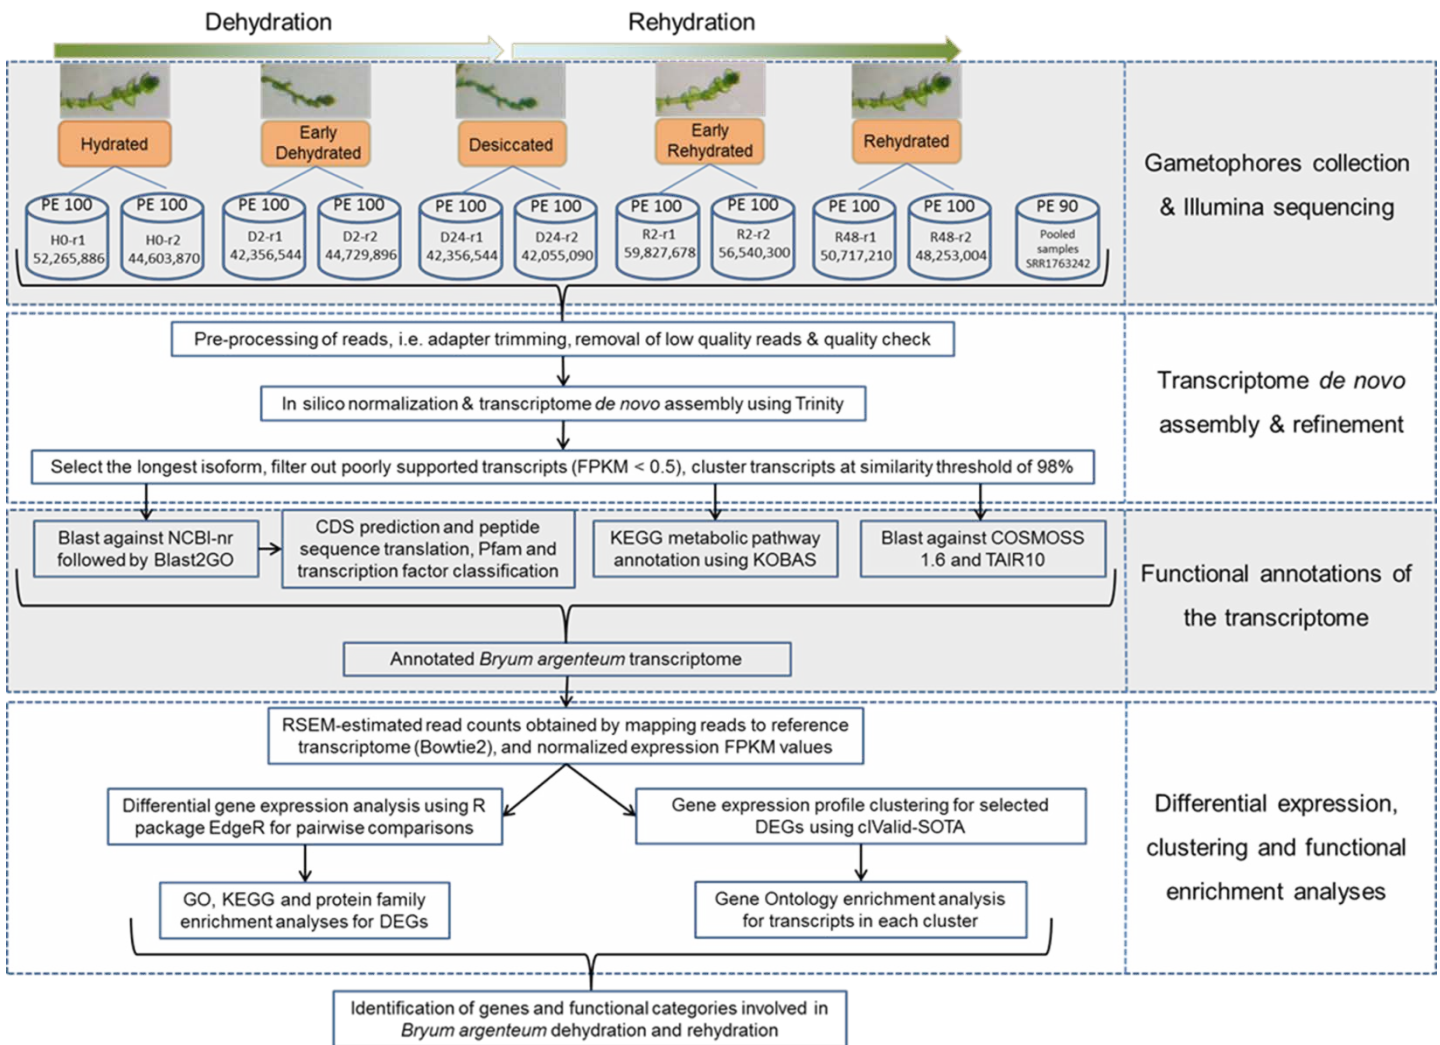

**Figure S2.** Flow-chart showing steps in *Bryum argenteum* transcriptome assembly and annotation, and downstream transcript clustering and differential expression analysis.

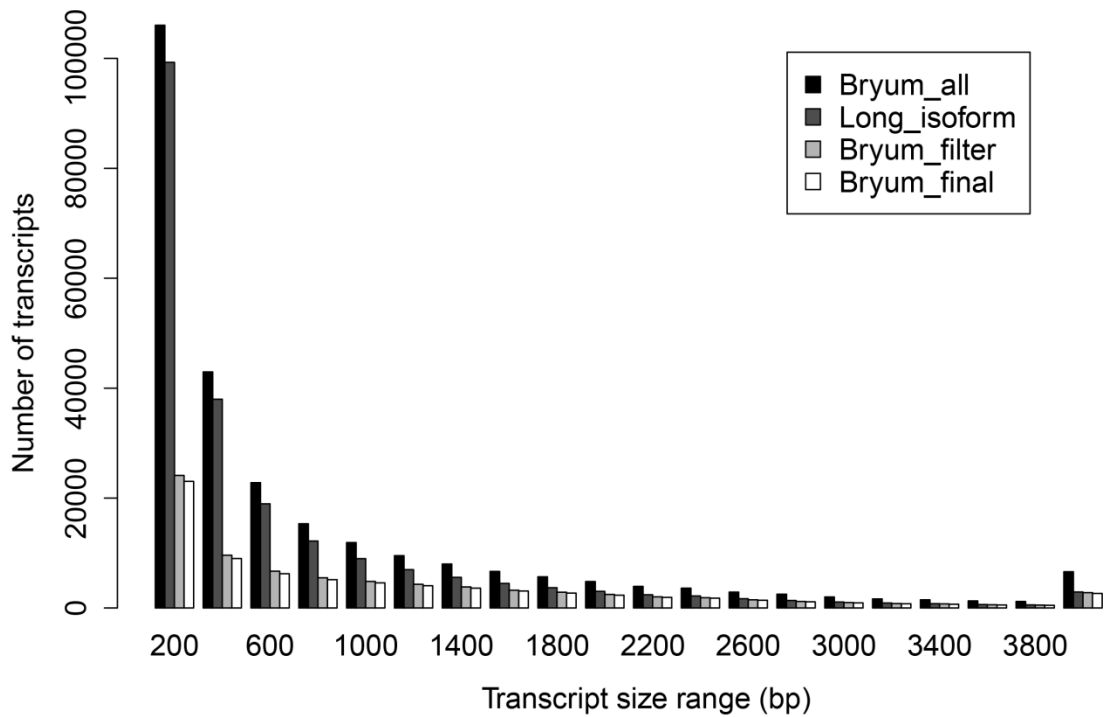

**Figure S3.** Transcript length distribution of the *de novo* assembled and refined *Bryum argenteum* transcriptomes, demonstrating the extremely high proportion of small-sized transcripts for the initial Bryum\_all transcriptome.

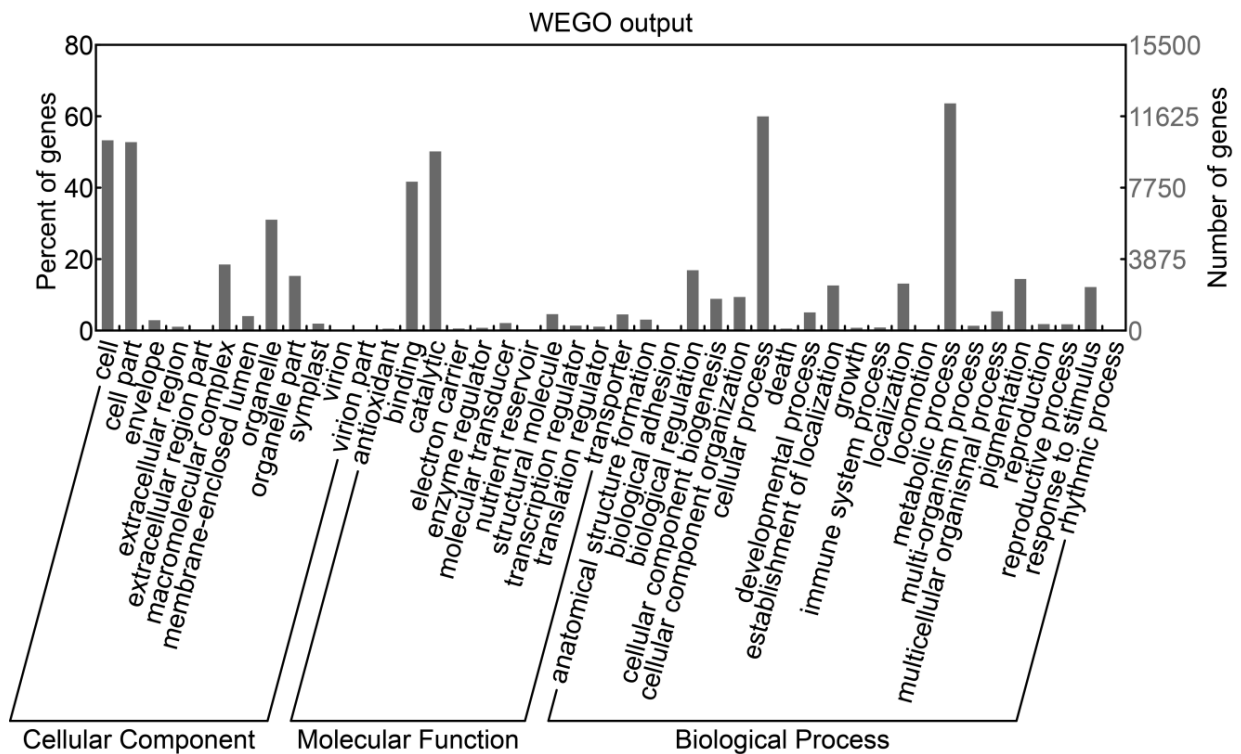

**Figure S4.** GO category distribution of Bryum\_final\_transcriptome among level 2 GO categories: biological process (BP), molecular function (MF), and cellular component (CC).

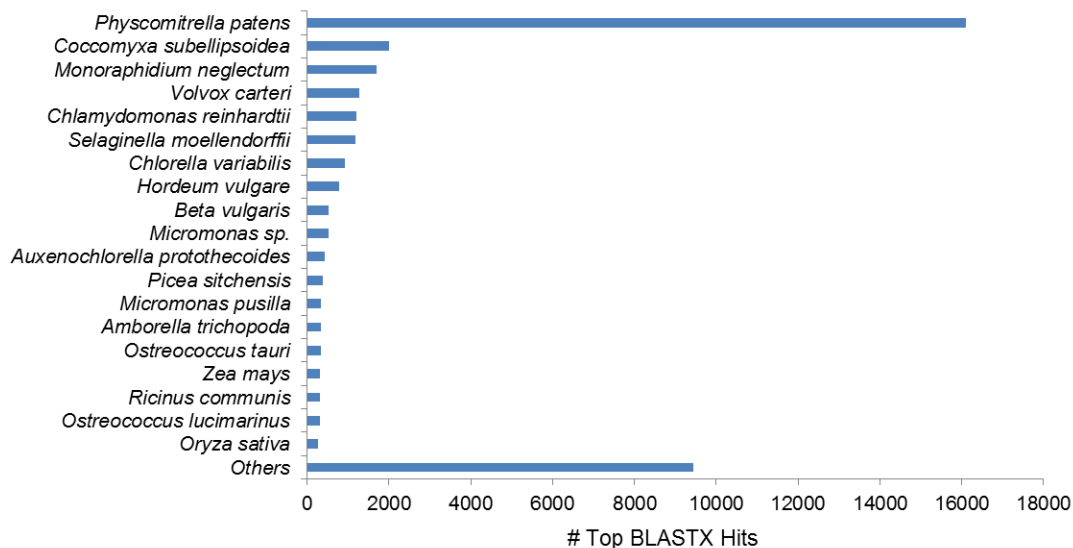

**Figure S5.** BLASTX top-hit species distribution of the *Bryum\_final* transcriptome in NCBI-nr database.

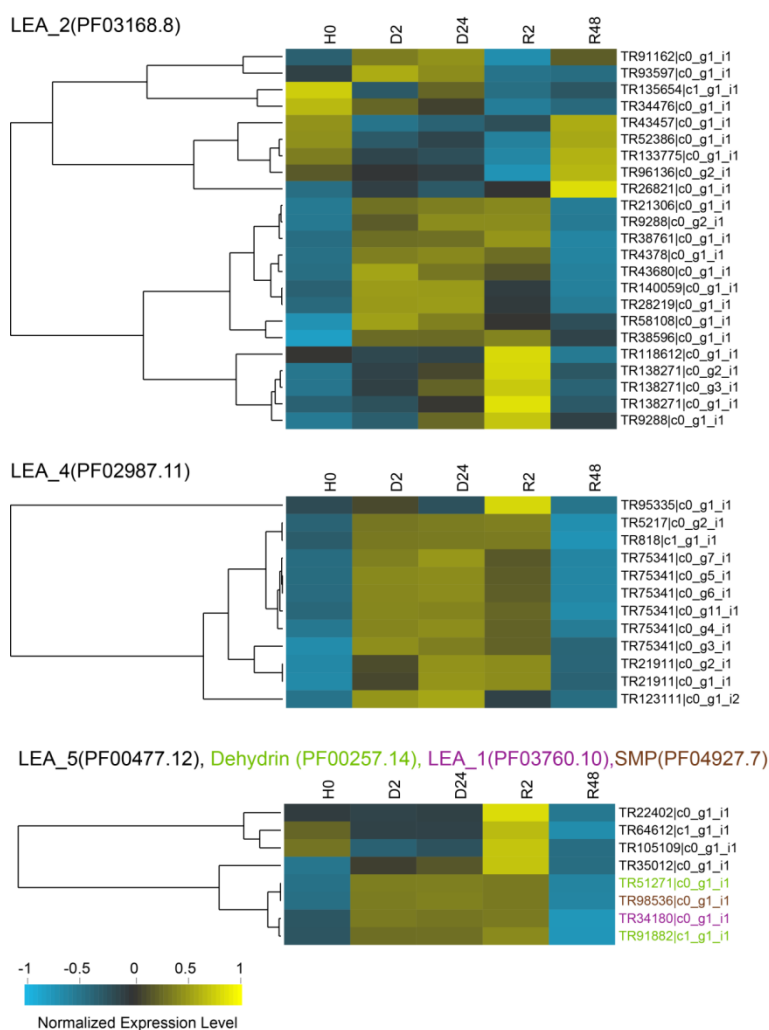

**Figure S6.** Heatmaps illustrating the expression profiles of the LEA group transcripts upon dehydration and rehydration.

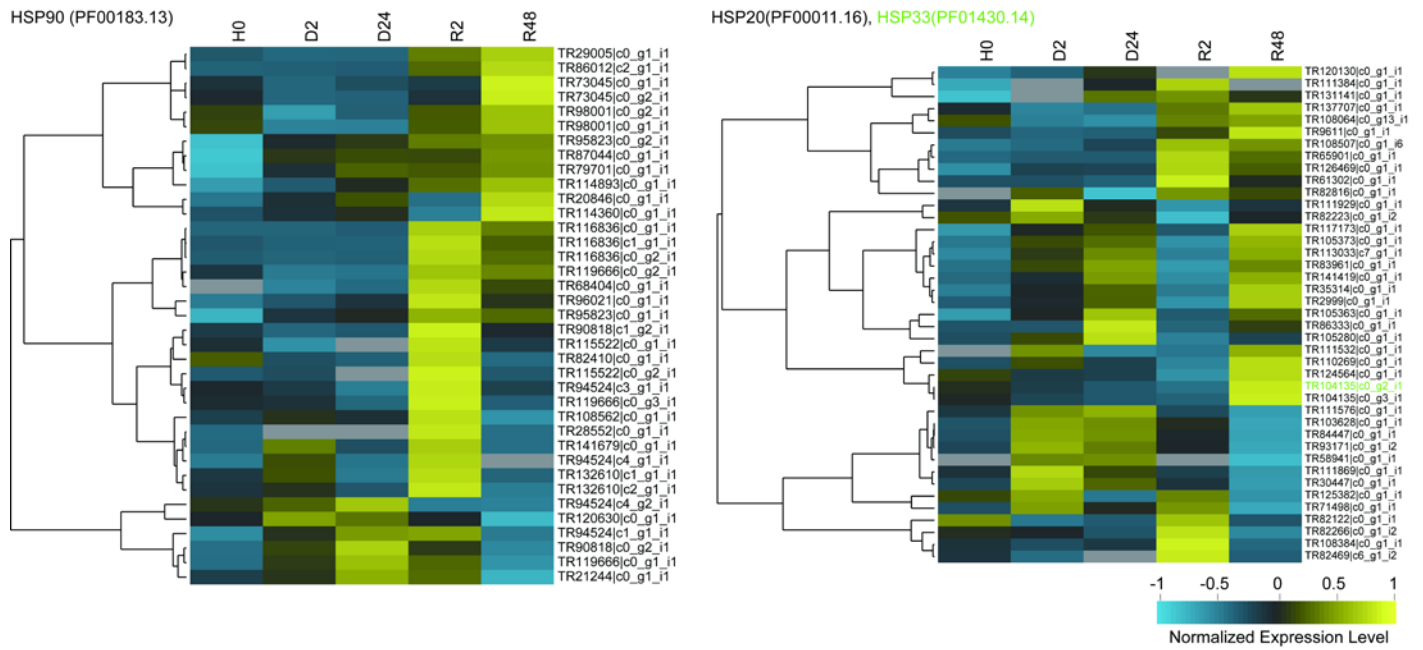

**Figure S7.** Heatmaps illustrating the expression profiles of the HSP90, HSP20 and HSP33 family transcripts upon dehydration and rehydration.

**Table S1.** Distribution of percent length coverage for the top matching Swiss-Prot database entries

| Percentage length coverage bin | Count in bin | Cumulative count |
|--------------------------------|--------------|------------------|
| 100                            | 5199         | 5199             |
| 90                             | 2267         | 7466             |
| 80                             | 1423         | 8889             |
| 70                             | 1051         | 9940             |
| 60                             | 942          | 10882            |
| 50                             | 891          | 11773            |
| 40                             | 774          | 12547            |
| 30                             | 684          | 13231            |
| 20                             | 546          | 13777            |
| 10                             | 132          | 13909            |

Examples of statements that can be made based on the table above:

- 5199 Swiss-Prot database proteins matches to a Trinity transcript by > 90% alignment coverage.
- 2267 database proteins matches to a Trinity transcript with an alignment coverage between 80% and 90%.
- 7466 database proteins matches to a Trinity transcript by > 80% alignment coverage.

**Table S2.** Percentage of total and uniquely mapped reads to the *Bryum\_final* reference transcriptome

| Sample   | Total_mapped_reads (%) | Uniquely_mapped_reads (%) | Multiple_aligned_reads (%) |
|----------|------------------------|---------------------------|----------------------------|
| H0-rep1  | 84.79                  | 73.71                     | 11.09                      |
| H0-rep2  | 85.12                  | 74.26                     | 10.86                      |
| D2-rep1  | 85.05                  | 74.25                     | 10.80                      |
| D2-rep2  | 84.91                  | 74.18                     | 10.73                      |
| D24-rep1 | 85.17                  | 74.42                     | 10.75                      |
| D24-rep2 | 84.54                  | 73.89                     | 10.65                      |
| R2-rep1  | 83.95                  | 73.18                     | 10.77                      |
| R2-rep2  | 84.23                  | 73.57                     | 10.67                      |
| R48-rep1 | 85.16                  | 76.76                     | 8.41                       |
| R48-rep2 | 85.64                  | 77.38                     | 8.26                       |

**Table S3.** Primers used for quantitative real-time PCR (qPCR) analysis

| Trinity transcript ID | Top hit in <i>P. patens</i>                                                          | Top hit in <i>A. thaliana</i>                                                                          | Description                     | Primer pairs                                            |
|-----------------------|--------------------------------------------------------------------------------------|--------------------------------------------------------------------------------------------------------|---------------------------------|---------------------------------------------------------|
| TR89377 c0_g1_i1      | Pp1s420_28V6.1 late embryogenesis abundant protein, putative / LEA protein, putative | AT3G53040.1   late embryogenesis abundant protein, putative / LEA protein, putative                    | LEA                             | S: GACAGGGAAACTATCACCGAATC<br>A: GCATCAAGAAGACCACCACCAT |
| TR72249 c0_g1_i2      | Pp1s330_39V6.1 photosystem I light harvesting complex gene 2                         | AT3G61470.1   Symbols: LHCA2   photosystem I light harvesting complex gene 2                           | LHCA2                           | S: TTTGTGATGGCTCCACGATA<br>A: CAGACGAAAAGACACTAAGGAT    |
| TR87355 c4_g1_i1      | Pp1s93_98V6.1 sucrose synthase 3                                                     | AT4G02280.1   Symbols: SUS3, ATSUS3   sucrose synthase 3                                               | SuSy                            | S: CATTAGGGTTGGAGAAAAGGC<br>A: CCACGCTGAACACCATAGGA     |
| TR91882 c1_g1_i1      | Pp1s442_22V6.2 Dehydrin family protein                                               | No hit found.                                                                                          | Dehydrin                        | S: CTATGGCGGCGTCAGTGAGC<br>A: CGGAGCGGAAGTCTCGGTAC      |
| TR75290 c0_g1_i4      | Pp1s172_69V6.1 ELIP1, ELIP   Chlorophyll A-B binding family protein                  | AT3G22840.1   Symbols: ELIP1, ELIP   Chlorophyll A-B binding family protein                            | ELIP                            | S: GAGATCGTCCGCAACCAGG<br>A: CAGTCCATCGAACATCCACA       |
| TR108206 c13_g2_i7    | Pp1s97_279V6.1 heat shock cognate protein 70-1                                       | AT5G02500.1   Symbols: HSC70-1, HSP70-1, AT-HSC70-1, HSC70   heat shock cognate protein 70-1           | HSP70                           | S: CATCGACGGCACAGACAACG<br>A: CCCTCAACGACTTCTCCACC      |
| TR51243 c0_g1_i1      | Pp1s55_256V6.1 Integrase-type DNA-binding superfamily protein                        | AT4G32800.1   Integrase-type DNA-binding superfamily protein                                           | ERF                             | S: TGTTTTTCGTATGGGCCTGAA<br>A: ATGTTGCTCTTGCGTGGGAC     |
| TR116182 c0_g1_i2     | Pp1s249_84V6.1 heat shock factor 3                                                   | AT5G16820.1   Symbols: HSF3, HSFA1B, ATHSFA1B, ATHSF3   heat shock factor 3                            | HSF3                            | S: AGCAGTCGGCTCAACCTCAG<br>A: TCAGCACATTCTATCCCTCTTC    |
| TR32094 c0_g1_i1      | Pp1s240_91V6.1 Protein kinase superfamily protein                                    | AT4G33950.1   Symbols: OST1, SNRK2-6, SRK2E, SNRK2.6, P44, ATOST1   Protein kinase superfamily protein | Protein kinase-SNRK             | S: AGTGCGGTTCAAGGAGGTCAT<br>A: AGGAGCAGGGCTTCCATCTAG    |
| TR125288 c0_g1_i5     | Pp1s25_29V6.1 zeaxanthin epoxidase (ZEP) (ABA1)                                      | AT5G67030.1   Symbols: ABA1, LOS6, NPQ2, ATABA1, ZEP, IBS3, ATZEP   zeaxanthin epoxidase (ZEP) (ABA1)  | ZEP                             | S: CCGTCTGTATCTCACTCTGCT<br>A: TTCCCACCGACACTATCAGG     |
| TR94041 c0_g1_i1      | Pp1s420_4V6.1 myb domain protein 20                                                  | AT1G66230.1   Symbols: MYB20, AtMYB20   myb domain protein 20                                          | MYB                             | S: CTTTGCCGTGGCTCATCTTC<br>A: GCACTTACCGTTGGGCGTCTC     |
| TR77358 c0_g1_i4      | Pp1s337_26V6.1 actin 7                                                               | AT5G09810.1   Symbols: ACT7   actin 7                                                                  | Actin (internal reference gene) | S: CTCTTAACCCCAAGGCAAACAG<br>A: CTTTCATCAGGGCATCAGTCAG  |
